# Supplementary material for: The Myb-p300-CREB axis modulates intestine homeostasis, radiosensitivity and tumorigenesis
Source: PubMed Central journal article supplement (PMC3641342; doi:10.1038/cddis.2013.119), 2013-04-25

CBP

a

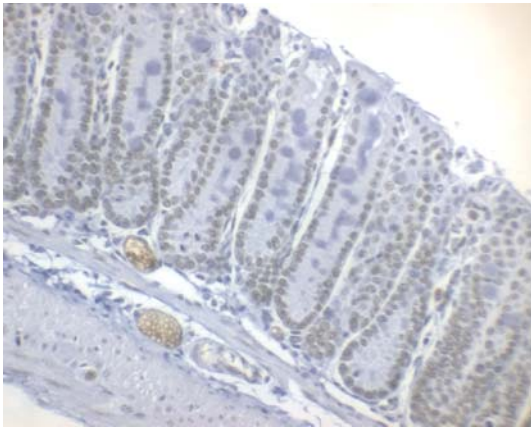

b

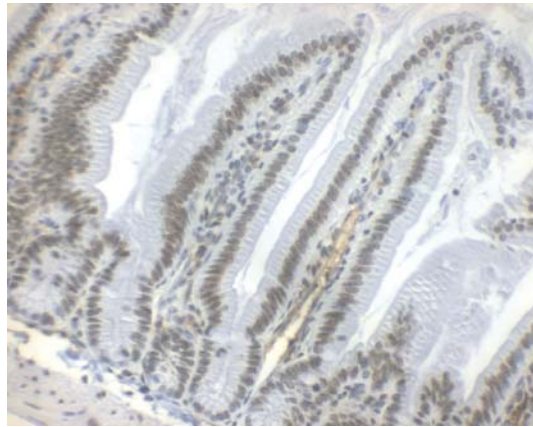

p300

c

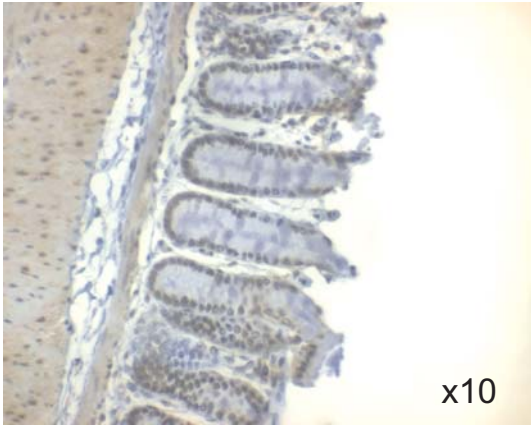

d

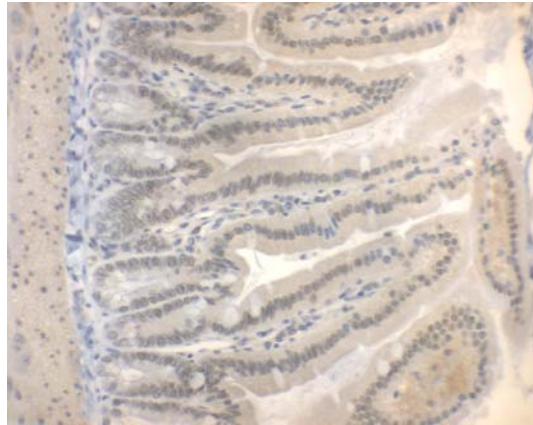

Supplement: cddis2013119x1.pdf [file cddis2013119x1.pdf]
