# Supplementary material for: The Myb-p300-CREB axis modulates intestine homeostasis, radiosensitivity and tumorigenesis
Source: PubMed Central journal article supplement (PMC3641342; doi:10.1038/cddis.2013.119), 2013-04-25

# ATF2

*creb<sup>fl/fl</sup>* + Tamoxifen

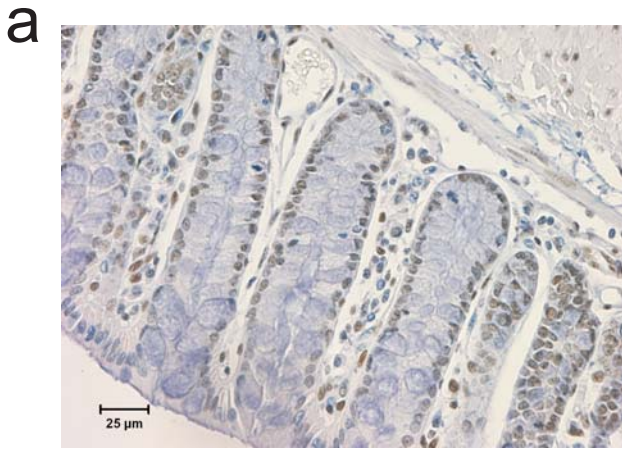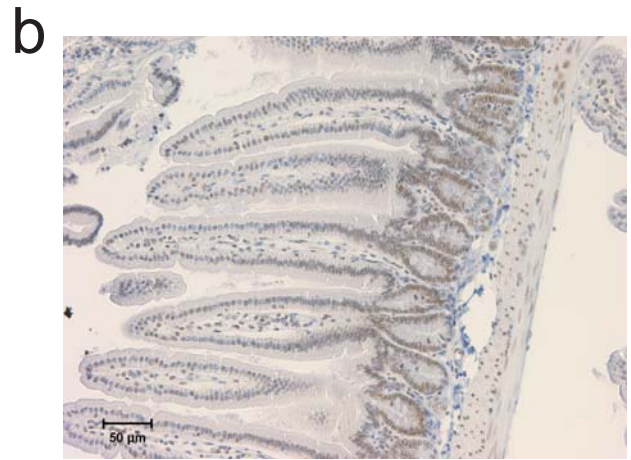

*creb<sup>fl/fl</sup>* x villinCRE<sup>EERT</sup> + Tamoxifen

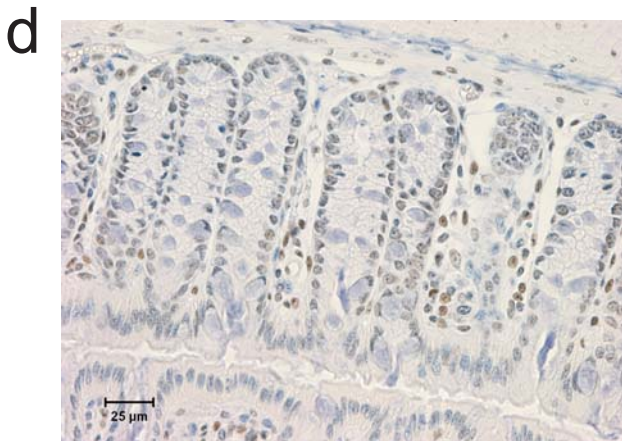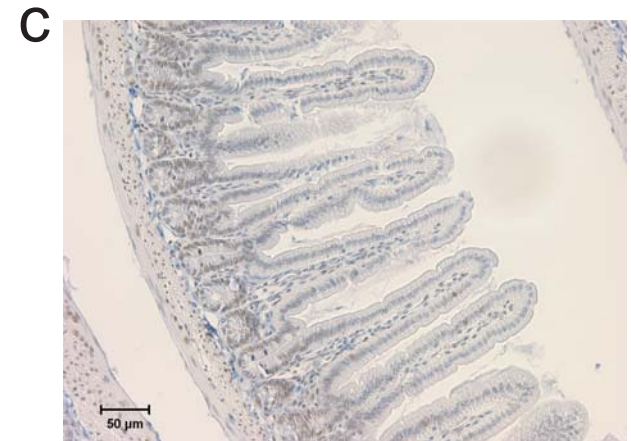

Supplement: cddis2013119x3.pdf [file cddis2013119x3.pdf]
