# Supplementary material for: The Myb-p300-CREB axis modulates intestine homeostasis, radiosensitivity and tumorigenesis
Source: PubMed Central journal article supplement (PMC3641342; doi:10.1038/cddis.2013.119), 2013-04-25

*creb<sup>f/f</sup>* + Tamoxifen

pTEN

*creb<sup>f/f</sup>* x villinCRE<sup>ERT</sup> + Tamoxifen

SI

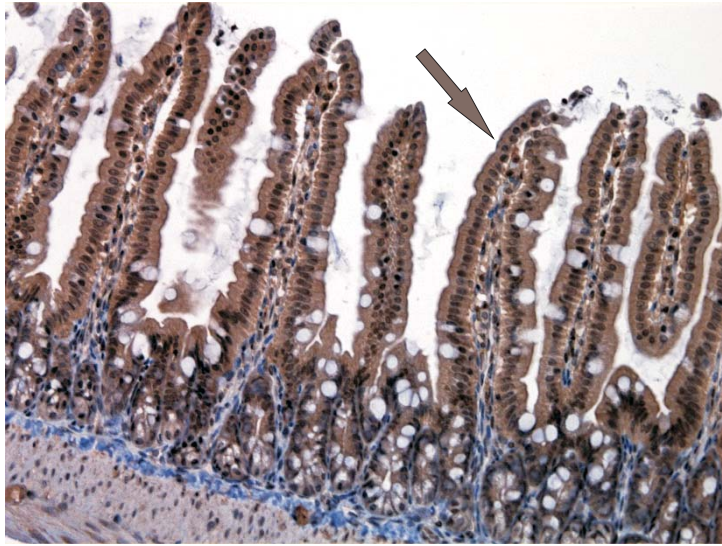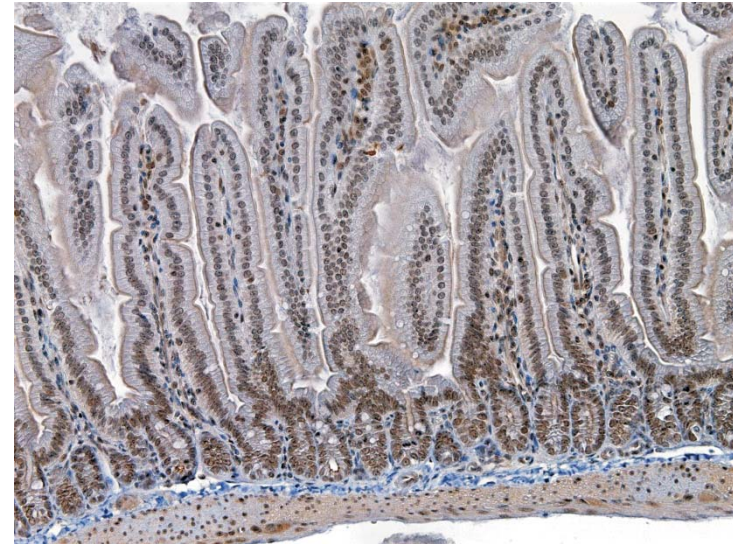

Colon

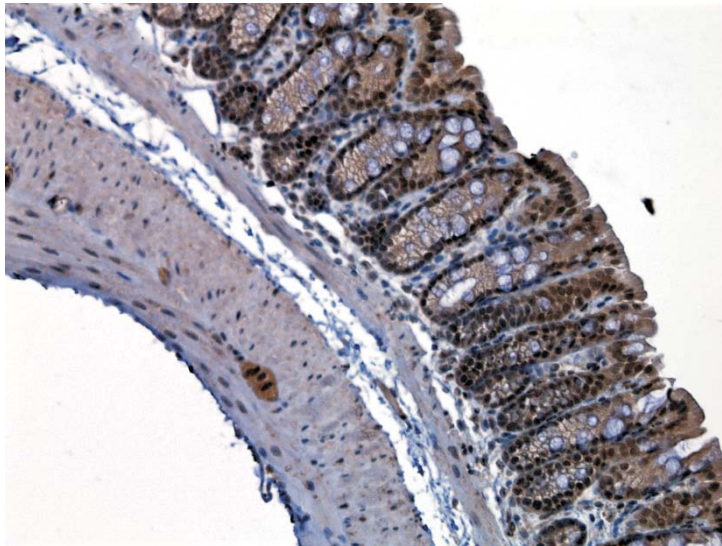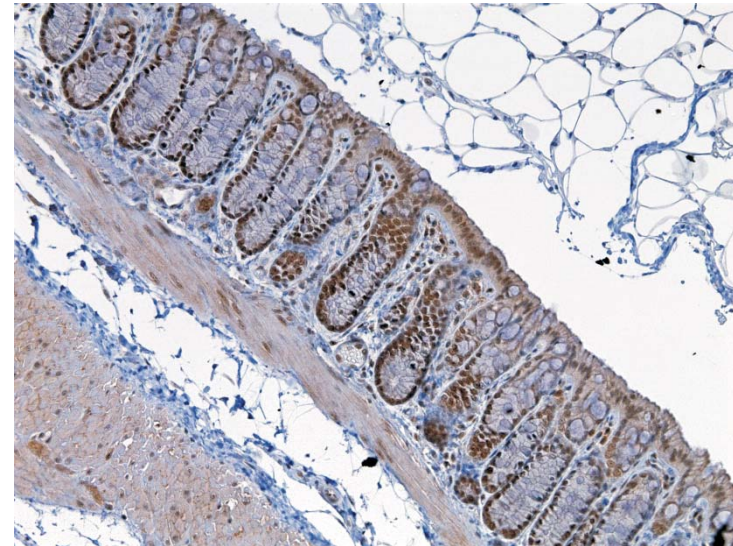

Supplement: cddis2013119x5.pdf [file cddis2013119x5.pdf]
